# Supplementary material for: Niobium sulfide nanocomposites as cathode materials for all-solid-state lithium batteries with enhanced electrochemical performance
Source: Royal Society of Chemistry journal article supplement (doi:10.1039/d4nr01035c), 2024-01-01
Supplement: d4nr01035c1.pdf [file d4nr01035c1.pdf]

## Supporting Information

# Niobium Sulfide Nanocomposite as Cathode Materials for All-Solid-State Lithium Batteries with Enhanced Electrochemical Performances

*Na Wang<sup>a,b</sup>, Mingyuan Chang<sup>b</sup>, Wenrui Xie<sup>a,b</sup>, Gaozhan Liu<sup>b</sup>, Lu Zhang<sup>b</sup>, Hao He<sup>a\*</sup>,*

*Xiayin Yao<sup>b,c\*</sup>*

*<sup>a</sup> Key Laboratory of Materials Physics of Ministry of Education, School of Physics  
and Laboratory of Zhongyuan Light, Zhengzhou University, Zhengzhou, Henan  
450001, P. R. China*

*<sup>b</sup> Ningbo Institute of Materials Technology and Engineering, Chinese Academy of  
Sciences, Ningbo 315201, P. R. China*

*<sup>c</sup> Center of Materials Science and Optoelectronics Engineering, University of Chinese  
Academy of Sciences, Beijing 100049, P. R. China.*

*\* Authors to whom correspondence should be addressed: yaoxy@nimte.ac.cn;  
hehao@zzu.edu.cn.*

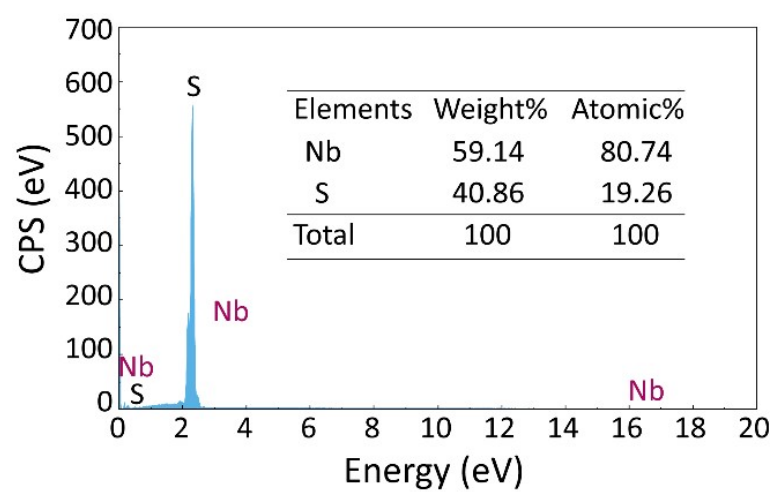

**Figure S1.** The EDS analysis in SEM and the composition results of NbS<sub>4</sub>.

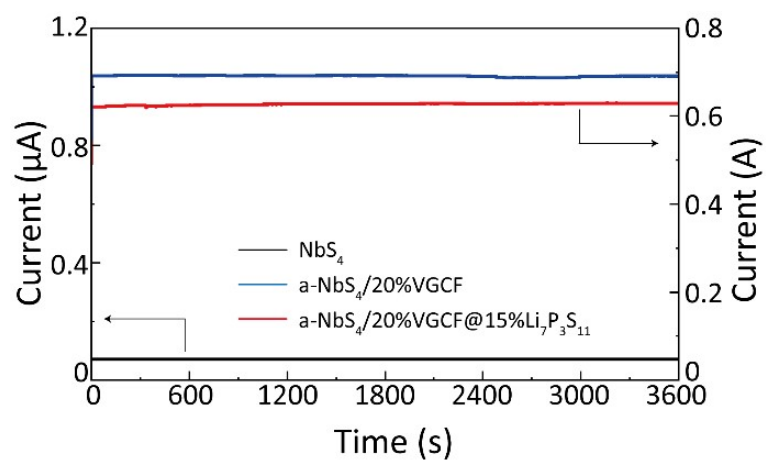

**Figure S2.** Current-time curves C/ $\text{NbS}_4$ /C, C/a- $\text{NbS}_4$ /20%VGCF/C and C/a- $\text{NbS}_4$ /20%VGCF@15% $\text{Li}_7\text{P}_3\text{S}_{11}$ /C cells under direct current polarization.

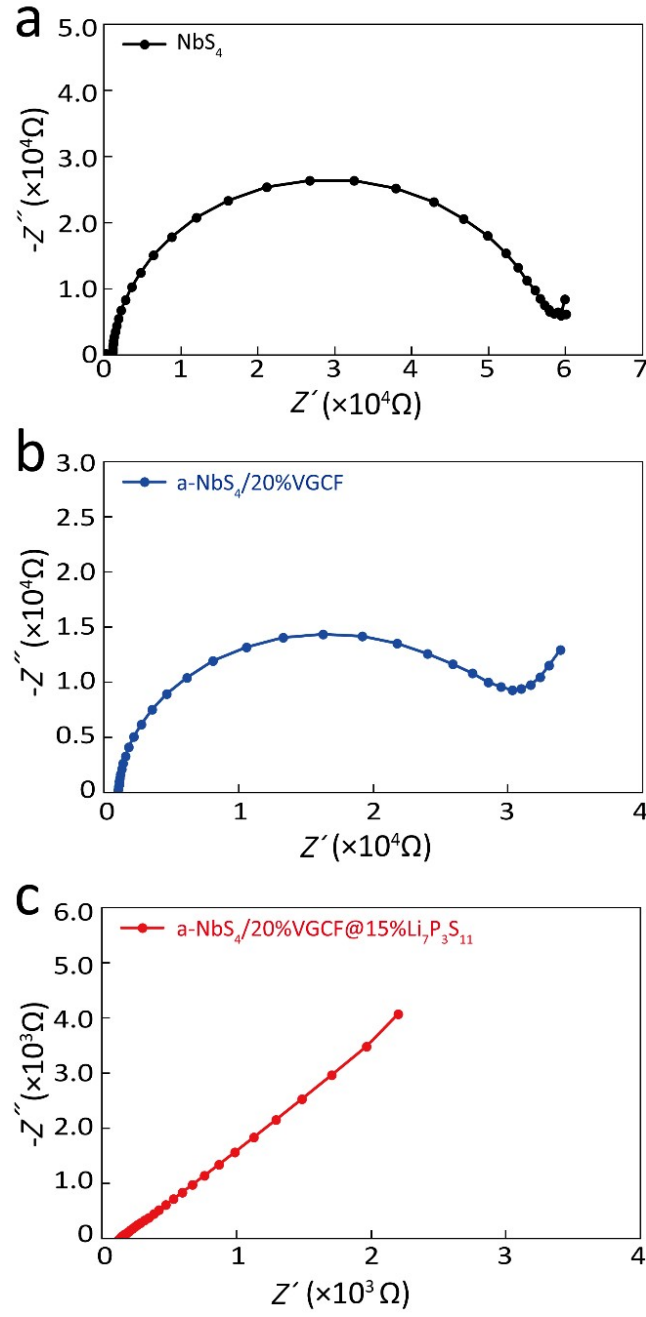

**Figure S3.** Impedance spectra of the (a)  $\text{Li}_{10}\text{GeP}_2\text{S}_{12}/\text{NbS}_4/\text{Li}_{10}\text{GeP}_2\text{S}_{12}$ , (b)  $\text{Li}_{10}\text{GeP}_2\text{S}_{12}/\text{a-NbS}_4/20\% \text{VGCF}/\text{Li}_{10}\text{GeP}_2\text{S}_{12}$  and (c)  $\text{Li}_{10}\text{GeP}_2\text{S}_{12}/\text{a-NbS}_4/20\% \text{VGCF}@15\% \text{Li}_7\text{P}_3\text{S}_{11}/\text{Li}_{10}\text{GeP}_2\text{S}_{12}$  cells.

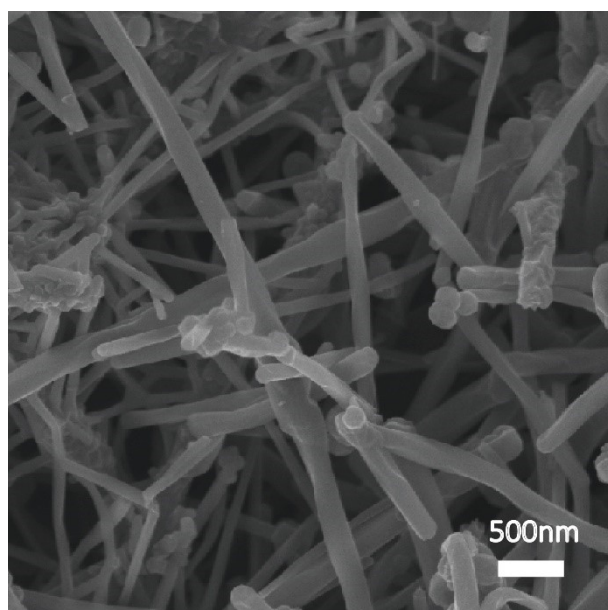

**Figure S4.** SEM image of VGCF.

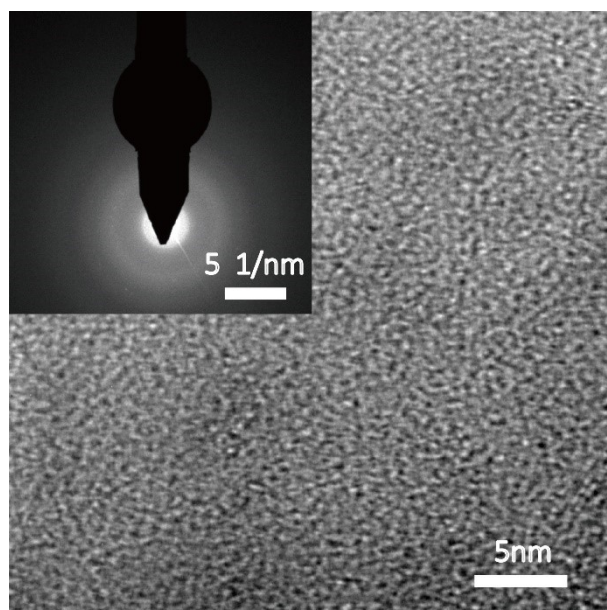

**Figure S5.** HRTEM image and SAED pattern of a-NbS<sub>4</sub>/20%VGCF.

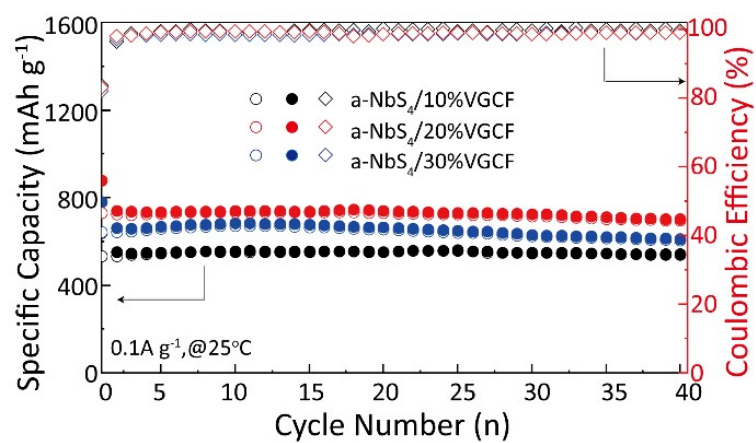

**Figure S6.** Cyclic performances of a-NbS<sub>4</sub>/10%VGCF, a-NbS<sub>4</sub>/20%VGCF and a-NbS<sub>4</sub>/30%VGCF cathodes at 0.1 A g<sup>-1</sup>.

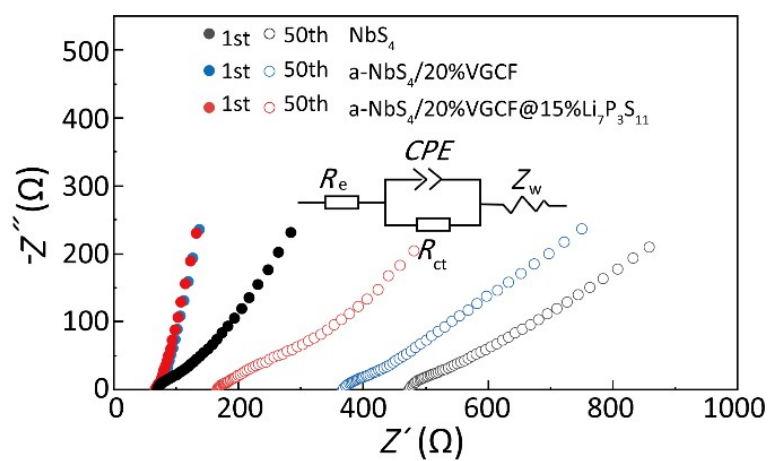

**Figure S7.** Nyquist plots of  $\text{NbS}_4$ ,  $\text{a-NbS}_4/20\%\text{VGCF}$  and  $\text{a-NbS}_4/20\%\text{VGCF}@15\%\text{Li}_7\text{P}_3\text{S}_{11}$  electrodes cycled at  $0.1 \text{ A g}^{-1}$  after the 1st and 50th cycles. The inset is the equivalent circuit model.

**Table S1.** Comparison of energy densities of commercialized cathode materials with NbS<sub>4</sub>.

| Material                                                               | Theoretical specific capacity (mAh g <sup>-1</sup> ) | Actual specific capacity (mAh g <sup>-1</sup> ) | Operating voltage (V) | Energy density (Wh Kg <sup>-1</sup> ) | Ref.      |
|------------------------------------------------------------------------|------------------------------------------------------|-------------------------------------------------|-----------------------|---------------------------------------|-----------|
| 4.5 V LiCoO <sub>2</sub>                                               | 274                                                  | 190                                             | 4                     | 760                                   | [S1]      |
| LiNi <sub>0.8</sub> Mn <sub>0.1</sub> Co <sub>0.1</sub> O <sub>2</sub> | 273~285                                              | 210                                             | 3.7                   | 777                                   | [S1]      |
| LiNi <sub>0.5</sub> Mn <sub>1.5</sub> O <sub>4</sub>                   | 147                                                  | 135                                             | 4.75                  | 641                                   | [S1]      |
| Li-Rich 300                                                            | 300~450                                              | 300                                             | 3.5                   | 1050                                  | [S1]      |
| LiFePO <sub>4</sub>                                                    | 170                                                  | 165                                             | 3.45                  | 569                                   | [S2]      |
| LiMn <sub>2</sub> O <sub>4</sub>                                       | 148                                                  | 120                                             | 3.7                   | 444                                   | [S3]      |
| NbS <sub>4</sub>                                                       | 970                                                  | 920.8                                           | ~1.8                  | ~1630                                 | This work |

**Table S2.** The fitted results of EIS plots for NbS<sub>4</sub>, a-NbS<sub>4</sub>/20%VGCF and a-NbS<sub>4</sub>/20%VGCF@15%Li<sub>7</sub>P<sub>3</sub>S<sub>11</sub> cathodes after 1<sup>st</sup> and 50<sup>th</sup> cycles at 0.1 A g<sup>-1</sup>.

| sample                                                                        | after 1 <sup>st</sup> cycle |                       | after 50 <sup>th</sup> cycle |                       |
|-------------------------------------------------------------------------------|-----------------------------|-----------------------|------------------------------|-----------------------|
|                                                                               | $R_e$ ( $\Omega$ )          | $R_{ct}$ ( $\Omega$ ) | $R_e$ ( $\Omega$ )           | $R_{ct}$ ( $\Omega$ ) |
| NbS <sub>4</sub>                                                              | 70.10                       | 40.02                 | 476.35                       | 165.19                |
| a-NbS <sub>4</sub> /20%VGCF                                                   | 69.84                       | /                     | 386.95                       | 131.54                |
| a-NbS <sub>4</sub> /20%VGCF@15%Li <sub>7</sub> P <sub>3</sub> S <sub>11</sub> | 66.33                       | /                     | 164.31                       | 58.68                 |

## References

- S1 W. Li, H. Xu, Q. Yang, J. Li, Z. Zhang, S. Wang, J. Peng, B. Zhang, X. Chen, Z. Zhang, M. Yang, Y. Zhao, Y. Geng, W. Huang, Z. Ding, L. Zhang, Q. Tian, H. Yu and H. Li, *Energy Storage Science and Technology*, 2020, **9**, 448-478.
- S2 Y. M. Zhu, Z. W. Ruan, S. Z. Tang and V. Thangadurai, *Ionics*, 2014, **20**, 1501-1510.
- S3 Z. I. Radzi, K. H. Arifin, M. Z. Kufian, V. Balakrishnan, S. R. S. Raihan, N. Abd Rahim and R. Subramaniam, *Journal of Electroanalytical Chemistry*, 2023, **928**, 1572-6657.
